PEARLS

## You can go your own way: The targeting signals of trypanosomatid parasites

Max Pendlebury, Julius Lukeš, Michael J. Hammond<sup>1</sup>\*

Institute of Parasitology, Biology Centre, Czech Academy of Sciences, and Faculty of Science, University of South Bohemia, České Budějovice (Budweis), Czech Republic

\* [michael.hammond@paru.cas.cz](mailto:michael.hammond@paru.cas.cz)

### Overview

Targeting and directing cytosol-synthesized proteins into organelles and cellular compartments constitutes a universal eukaryotic challenge. The discovery that specific peptide sequences are responsible for this localization not only earned a Nobel prize, but also provided a powerful tool for investigating eukaryotic evolution and diversification [1]. While the term ‘targeting signal’ encompasses a broad range of sequences with varying properties, here we define them as sequences—or a set of sequences—that are both necessary and sufficient to ensure a protein reaches its correct cellular localization. Parasitic trypanosomatids, represented primarily by model protist *Trypanosoma brucei*, constitute the most thoroughly investigated eukaryotes in this regard outside of opisthokonts and plants. Here we provide a protistan perspective on the targeting signals, both innovated and derived, employed by trypanosomatid flagellates for this purpose (Fig 1).

### The secretory pathway

The eukaryotic signal peptide (SP), a 15–30 amino acid (AA)-long hydrophobic sequence conferred to the N-terminus (Fig 2), designates newly synthesized proteins for the secretory pathway, which encompasses several organelles (Fig 3A) [1]. Proteins are imported into the endoplasmic reticulum (ER) co-translationally through a signal recognition particle-dependent pathway, or post-translationally without this complex. Confinement to the ER is delineated by a tetrapeptide retention motif, mildly divergent from those found in opisthokonts (Fig 2) [2]. *T. brucei* SP-containing proteins are unlike opisthokonts in that they can utilize both pathways of transit, rather than being transported solely through the co-translational pathway. However, glycosylphosphatidylinositol (GPI)-anchored proteins, which typically possess SPs, have been shown strictly utilizing the post-translational pathway for transport [3].

*T. brucei* expresses primarily GPI-anchored proteins at the cell surface, including variable surface glycoproteins (VSGs) which are critical to parasite virulence in the mammalian host. As a result, the secretory pathway is tailored for the bulk flow of GPI-anchored proteins to the cell membrane. In the ER, a C-terminal hydrophobic sequence is cleaved and replaced with GPI (Fig 2), which then acts as a targeting signal to the cell membrane. All folded proteins are exported from the ER in coat

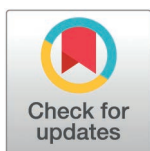

### OPEN ACCESS

**Citation:** Pendlebury M, Lukeš J, Hammond MJ (2025) You can go your own way: The targeting signals of trypanosomatid parasites. PLoS Pathog 21(8): e1013326. <https://doi.org/10.1371/journal.ppat.1013326>

**Editor:** Laura J. Knoll, University of Wisconsin Medical School, UNITED STATES OF AMERICA

**Published:** August 1, 2025

**Copyright:** © 2025 Pendlebury et al. This is an open access article distributed under the terms of the [Creative Commons Attribution License](https://creativecommons.org/licenses/by/4.0/), which permits unrestricted use, distribution, and reproduction in any medium, provided the original author and source are credited.

**Funding:** This lab is supported by the Czech Grant Agency (23-06479X). The funders had no role in study design, data collection and analysis, decision to publish or preparation of the manuscript.

**Competing interests:** The authors have declared that no competing interests exist.

protein II (COPII) vesicles, while GPI-anchored VSGs rely on a distinct type of COPII vesicle to transport this cargo exclusively. This likely represents a mechanism for the priority export of these abundant VSGs, which arrive at the surface faster relative to other membrane proteins [4]. Other polytopic membrane proteins are exported (directly or indirectly) via alternate targeting signals, such as that of the cysteine-rich, acidic, integral membrane (CRAM) protein, which relies on a hydrophilic C-terminal sequence for both ER export and cell membrane localization (Fig 2) [2]. Other trypanosomatids display unique cell-membrane targeting signals which are dependent on post-translational modifications of key residues. In *Leishmania major*, a hydrophilic acylated surface protein B (HASP B) lacks transmembrane domains (TMDs), a SP, and a GPI anchor, instead relying on two acylation sites at the N-terminus which are sufficient for cell surface localization [5]. Additionally, *Trypanosoma cruzi*-specific phosphoinositide phospholipase C (TcPI-PLC) localizes to the plasma membrane during the amastigote stage, only when residues Gly2 and Cys4 are acylated [6].

Targeting of proteins to the Golgi and lysosomes in trypanosomatids is similar to that of opisthokonts. Selected proteins are targeted to specific regions within the Golgi apparatus, as seen with coiled-coil proteins possessing a Golgin-97, RanBP2alpha, Imh1p, and p230/golgin-245 (GRIP) domain, which are targeted exclusively to the *trans*-cisternae [2]. Secretory proteins can be further sorted for

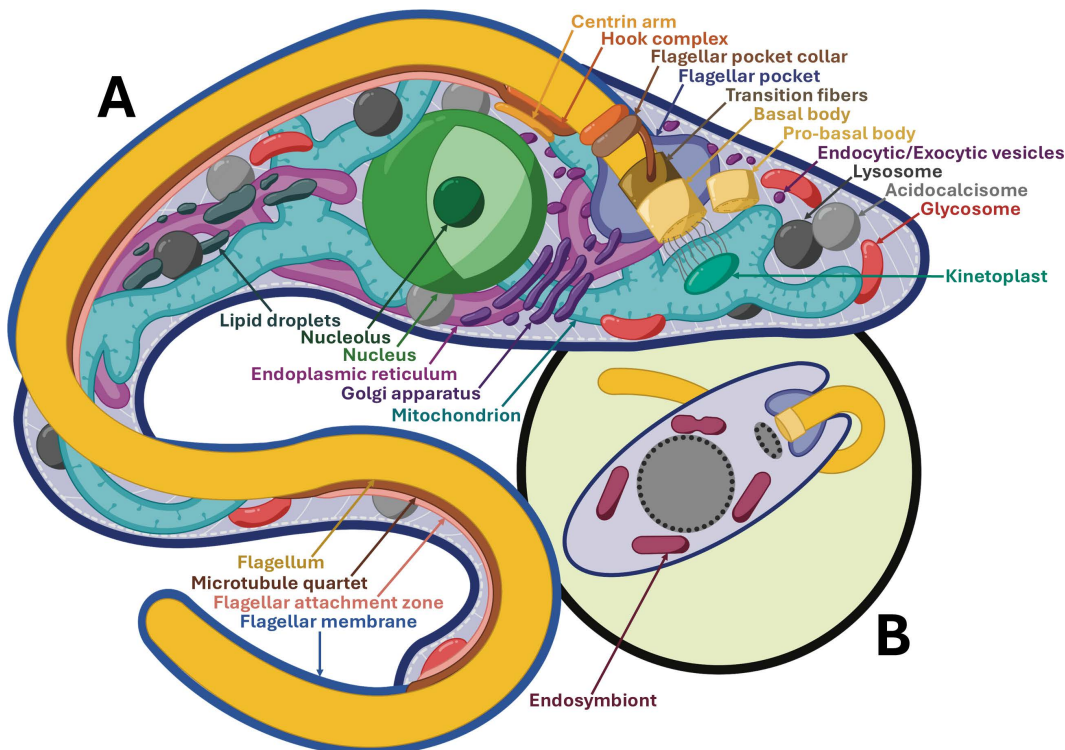

**Fig 1. Schematic representation of trypanosomatid model organisms. (A) Overview of *Trypanosoma brucei* procyclic form organelles and cellular compartments. (B) Simplified overview of endosymbiont-containing *Novymonas esmeraldas*.**

<https://doi.org/10.1371/journal.ppat.1013326.g001>

| Signal type                                                                           | Signal details                                                                                            | Schematic diagram                                                                    | Ref. |
|---------------------------------------------------------------------------------------|-----------------------------------------------------------------------------------------------------------|--------------------------------------------------------------------------------------|------|
| <b>Secretory Pathway</b>                                                              |                                                                                                           |                                                                                      |      |
| Signal peptide (SP)                                                                   | Hydrophobic<br>15-30 amino acids (AA)                                                                     |    | [1]  |
| ER-retention motif                                                                    | C-terminal motif: Eg. MDDL, KQDL                                                                          |    | [2]  |
| GPI-anchor in plasma membrane proteins                                                | C-terminal sequence cleaved for GPI attachment                                                            |    | [4]  |
| CRAM membrane protein (Tb927.10.7180)                                                 | Transmembrane domain (TMD)<br>C-terminal 17 AA ER export signal                                           |    | [2]  |
| <i>Leishmania major</i> HASPB (LmjF.23.1060)                                          | Post-translational modifications (PTMs) necessary for plasma membrane association at extracellular region |    | [5]  |
| <i>Trypanosoma cruzi</i> PI-PLC (TcCLB.504149.160)                                    | PTMs necessary for plasma membrane association at extracellular region                                    |    | [6]  |
| GRIP domain containing protein (Tb927.11.7200)                                        | C-terminal domain<br>Localizes between trans-Golgi network                                                |    | [2]  |
| p67 Lysosomal signal (Tb927.5.1810)                                                   | C-terminal motif: [DE]XXXL[LI]-[DE]XXXL[LI]                                                               |    | [7]  |
| Cysteine proteases                                                                    | 100-122 AA Prodomain (PRO) at the N-terminus                                                              |    | [2]  |
| <i>T. cruzi</i> Unconventional myosin (TcCLB.506779.190)                              | C-terminal targeting motif to cytosome-cytopharynx complex (SPC)                                          |    | [9]  |
| <b>Mitochondrion</b>                                                                  |                                                                                                           |                                                                                      |      |
| Mitochondrial presequence a.k.a mitochondrial target peptide (mTP)                    | ≥8 AA, cleaved in matrix                                                                                  |    | [10] |
| Conservative-insertion signal                                                         | Found on inner mitochondrial membrane (IMM) integral proteins                                             |    | [10] |
| Stop-transfer-insertion signal                                                        | Found on IMM integral proteins, avoids complete translocation into matrix                                 |    | [10] |
| TbTim17 (Tb927.11.13290)                                                              | 1 <sup>st</sup> and 4 <sup>th</sup> TMD domains critical for IMM integration                              |    | [11] |
| Trypanosome alternative oxidase (Tb927.10.7090)                                       | Internal signal is not cleaved                                                                            |    | [12] |
| Signal-anchored POMP10 (Tb927.11.13180)                                               | Positively charged AA on either side of TMD domain, inserted into outer mitochondrial membrane (OMM)      |    | [13] |
| Tail-anchored OMM proteins                                                            | Positively charged AA following TMD domain: XRRRX <sub>1-3</sub> R                                        |    | [14] |
| <b>Glycosomes</b>                                                                     |                                                                                                           |                                                                                      |      |
| Peroxisomal targeting signal (PTS)1                                                   | C-terminal Tripeptide motif SKL, AKL etc.                                                                 |    | [15] |
| PTS2                                                                                  | N-terminal 9 AA motif                                                                                     |    | [15] |
| Membrane (m)PTS1                                                                      | ~11 AA basic or hydrophobic residues adjacent to TMD                                                      |   | [16] |
| TbPex13.1 (Tb927.10.14720)                                                            | Glucose-dependent localisation, SH3 domain typically interacts with Pex5                                  |  | [17] |
| <b>Nucleus</b>                                                                        |                                                                                                           |                                                                                      |      |
| Nuclear localisation signals (NLS)                                                    | Basic residues 4-7 AAs<br>Bipartite (eg. TbESAG, Tb927.1.3670) or Monopartite (eg. TbLA1, Tb927.10.2370)  |  | [18] |
| Nucleolar targeting signal (NoLs)                                                     | Basic stretch or multipartite motif of basic AAs (eg. Helicase, Tb927.5.4270)                             |  | [19] |
| Nuclear exit signal (NES)                                                             | Conventional eukaryotic motif: LXXLXXXXL                                                                  |  | [20] |
| <b>Flagellum</b>                                                                      |                                                                                                           |                                                                                      |      |
| Adenylate kinases                                                                     | 55 AA N-terminal signal                                                                                   |  | [21] |
| PFR2 (Tb927.8.4970)                                                                   | Bipartite motif, HLA submotif also found in other flagellar-localized proteins                            |  | [21] |
| Membranous calcium binding flagellar proteins                                         | 24 AA N-terminal signal<br>PTMs necessary for flagella membrane integration                               |  | [21] |
| Adenylate cyclases of the flagellar membrane                                          | 45 AA C-terminal motif, bolded residues inferred to confer additional flagella tip sub-localisation       |  | [22] |
| <b>Endosymbiont (Ca. <i>Pandoraea novymonadis</i> of <i>Novymonas esmerladas</i>)</b> |                                                                                                           |                                                                                      |      |
| TMP18e (NESM_000205400.1)                                                             | ~25 AA N-terminal signal                                                                                  |  | [23] |

**Fig 2. Trypanosomatid signals employed for protein targeting, with accession identity specified in cases of singular examples and acronyms bolded at first appearance.** Trypanosomatid species is clarified and specified for protein representatives outside of *Trypanosoma brucei*.

<https://doi.org/10.1371/journal.ppat.1013326.g002>

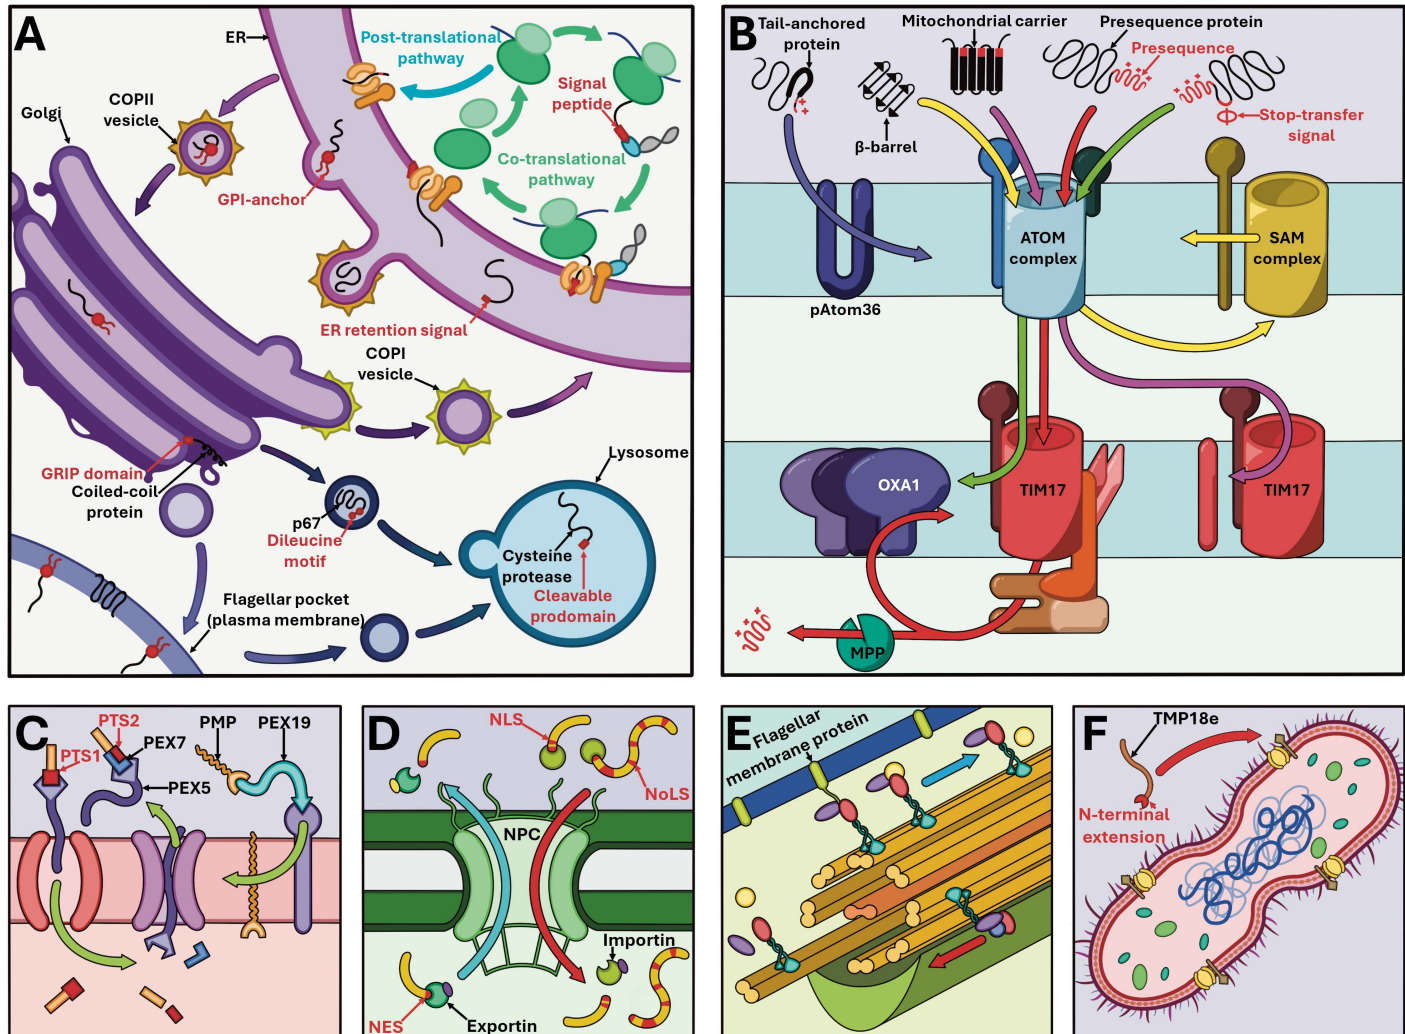

**Fig 3. Overview of major protein targeting pathways in *Trypanosoma brucei* (unless stated otherwise).** (A) Secretory pathway with relevant organelles of endoplasmic reticulum (ER), Golgi body, lysosomes, and plasma membrane. (B) Protein targeting across and into both mitochondrial membranes. (C) Targeting mediated by PEX proteins in glycosomes, employed on proteins containing PTS1 and PTS2 targeting signals as well as peroxisomal membrane proteins (PMP). (D) Trafficking through the nuclear pore complex (NPC), with entry mediated via Nuclear localization signals (NLS) and Nucleolar targeting signals (NoLS) and exit via Nuclear exit signals (NES). (E) Flagellar protein trafficking, with retrograde (blue arrow) and anterograde direction (red arrow) indicated across the axoneme. (F) Endosymbiont-targeted TMP18e in *Novyomonas esmeraldas*. Targeting signals on proteins are highlighted in red, with acronyms defined in Fig 2.

<https://doi.org/10.1371/journal.ppat.1013326.g003>

transport to the lysosomes, with lysosomal membrane protein p67 directed from the Golgi apparatus utilizing two dileucine motifs, deletion of which results in cell membrane trafficking instead (Fig 2) [7]. Cysteine proteases of the lysosomal lumen rely on a cleavable N-terminal prodomain in addition to a SP for trafficking (Fig 2) [2]. These targeting signals also appear to be conserved within the stage-specific megasomes and multivesicular tubule lysosomes of *Leishmania* species [8]. For other lysosome-like organelles, including acidocalcisomes and *T. cruzi*-specific reservosomes, little is known concerning protein targeting, though there is evidence to suggest that trafficking to acidocalcisomes differs between trypanosomatids and opisthokonts [2].

*T. cruzi* additionally possesses a derived feeding apparatus known as the cytostome-cytopharynx complex (SPC) which acts as its main site for endocytosis. Though the structure itself is enigmatic, a class of orphan myosins employ a C-terminal extension which is sufficient for SPC targeting (Fig 2) [9].

## Mitochondrion

Despite possessing radically diverged mitochondrial translocation machinery when compared to other eukaryotes [10], mitochondrial targeting signals in *T. brucei* have remained relatively consistent and recognizable (Fig 3B).

Many *T. brucei* matrix and inner mitochondrial membrane (IMM) proteins rely on positively charged N-terminal presequences (Fig 2). Typically shorter than in other eukaryotes ( $8 \leq \text{AA}$ ), they interact with diverged outer mitochondrial membrane (OMM) atypical translocase of outer membrane (ATOM) complex, then with TbTim17 in the IMM to translocate into the matrix where the presequence is cleaved (Fig 3B) [10]. The IMM proteins possessing a hydrophobic stretch following this presequence will arrest within TbTim17 and laterally release into the IMM, while the IMM proteins fully translocated into the matrix are inserted *via* oxidase assembly protein 1 orthologues (Fig 3B) [10]. The internal signals employed by polytopic transporters, such as mitochondrial carrier proteins, remain sparsely investigated. However, TbTim17 itself employs two internal targeting signals within its first and fourth TMDs for IMM integration (Fig 2) [11]. Trypanosome alternative oxidase additionally complements its presequence with an internal targeting signal, which alone proves sufficient for mitochondrial import (Fig 2) [12].

A sole signal-anchored OMM protein, present in the outer mitochondrial membrane proteome 10 (POMP10), has been characterized. It flanks its N-terminal TMD with canonical positive residues and is reliant on trypanosomatid pATOM36 for insertion in the absence of a mitochondrial import complex (Fig 2) [13]. Similarly, several tail-anchored OMM proteins have recently been experimentally identified. They possess a C-terminal TMD which is succeeded by several basic residues, reminiscent of their opisthokont counterparts (Fig 2) [14]. Contrastingly, the OMM  $\beta$ -barrel proteins of trypanosomatids lack the C-terminal hydrophobic  $\beta$ -hairpin, typically necessary for transport and insertion, suggesting the presence of a divergent targeting mechanism.

## Glycosomes

Trypanosomatids have modified peroxisomes termed glycosomes, which compartmentalize the first six or seven steps of glycolysis. This is achieved by furnishing these enzymes with canonical peroxisomal targeting signal (PTS)1 or PTS2 (Fig 3C). The PTS1 signal is positioned at the C-terminus with a conserved tripeptide motif which interacts with the soluble peroxisome biogenesis factor (PEX)5 chaperone, while PTS2 signal is N-terminally located with a 9 AA-long conserved motif, interacting with both PEX7 and PEX5 (Fig 2) [15].

Most glycosomal membrane proteins contain a membrane PTS1 signal (mPTS1). The *T. brucei* mPTS1 signal includes an ~11 AA-long string of hydrophobic or basic residues adjacent to a TMD, as observed in other eukaryotes [16]. However, membranous TbPex13.1 uniquely possesses both a PTS1 as well as a canonical PEX19 binding domain (Fig 2). In glucose-rich environments, mPTS1 mediates insertion into the glycosomes through interaction with PEX19. However, in glucose-poor environments, PTS1 directs TbPex13.1 to the ER, where it is instead involved in *de novo* glycosome biogenesis [17].

## Nucleus

Trypanosomatids contain a canonical nuclear localization signal (NLS) which can be monopartite, composed of four or seven basic AAs, as well as bipartite with two basic stretches separated by a 10–12 AA-long linker (Fig 2). The nuclear proteome of *T. brucei* is predicted to contain 68% canonical NLSs [18]. The remaining proteins likely rely on a non-canonical NLS or may be imported *via* a complex which contains at least one canonical NLS (Fig 3D). Various *Leishmania* and *T. cruzi* proteins are reported to possess non-canonical NLS of varying properties, highlighting the heterogenous nature of NLSs in trypanosomatids [18].

Nucleolar targeting signals (NoLSs), like NLSs, are dependent on the presence of basic AAs. While NoLS can form a homopolymer string, the overall basicity of the protein is ultimately important for nucleolar localization, leading to multipartite basic motifs as well (Fig 2). As in other eukaryotes, high intrinsic disorder and low hydrophobicity are also important features for nucleolar proteins in *T. brucei* [19]. Trypanosomatids additionally make use of canonical nuclear exit signals similar to those found in opisthokonts to export proteins from the nucleus to the cytoplasm (Fig 2) [20].

## Flagellum

Intraflagellar transport (IFT) complexes are employed by eukaryotes for delivery of many flagellar proteins (Fig 3E). Employed motifs mediating interactions with these IFTs are highly variable, lacking the more unified signals used across membranous organelles.

Two trypanosome adenylate kinases employ a conserved 55 AA-long N-terminal motif which produces a flagellar localization (Fig 2). By contrast, paraflagellar rod 2 (PFR2) protein carries two motifs within its C-terminus: first, a region of approximately  $\leq 56$  AA, which by itself incorporates PFR2 within the flagellum as well as the cytoplasm, and a second downstream seven AA-long region which together confers an exclusive flagellar localization (Fig 2) [21]. A specific region of PFR2's second motif, the tripeptide 'HLA', is additionally observed in other flagellar proteins such as TrypARP, as well as in Tektin C, and is required by these proteins to reach the flagellum. By itself, however, this tripeptide is insufficient to produce an exclusive flagellar signal, further demonstrating the multipartite nature of many signals for structural proteins of the flagellum [21].

A number of trypanosomatid membranous flagellar proteins rely on acylation of N-terminal glycine and cysteine with myristate and palmitate, respectively, for proper localization, including small myristoylated protein-1, calflagins and flagellar calcium-binding protein (Fig 2) [21]. A set of adenylate cyclases localizes to varying sub-compartments of the flagellum. Adenylate cyclases possess both a SP and TMD for membrane targeting but also employ a  $\sim 45$  AA-long C-terminal domain for flagellar localization. A selection of five AAs within this region additionally appear responsible for directing certain adenylate cyclases to the flagellar tip (Fig 2) [22].

Specific targeting signals for proteins of the basal body, transition fibers, or the array of cytoskeletal structures that surround the flagellar pocket remains poorly understood by contrast. Given the importance of these structures for parasite virulence, this knowledge gap warrants further investigation.

## Endosymbionts

Two trypanosomatid lineages harbor metabolically beneficial bacterial endosymbionts, into which endosymbiont-targeted proteins (ETPs) encoded by the host are directed (Fig 1B). *Novymonas esmeraldas* targets endosymbiont-associated transmembrane protein 18 (TMP18e) to the membrane of the bacterium *Ca. Pandoraea novymonadis* via a  $\sim 25$  AA-long N-terminal extension, where it controls endosymbiont positioning and copy number, while the ancestral homolog TMP18, which lacks this extension, is targeted instead to the host nuclear envelope (Fig 3F) (Fig 2) [23]. *Angomonas deanei* harbors a singular *Ca. Kinetoplastibacterium* sp. which undergoes coordinated replication prior to that of the host organelles. One bacterial gene, ornithine cyclodeaminase, has undergone lateral gene transfer to the host genome, and is retargeted to the glycosomes via a PTS1 signal [24]. At least seven ETPs are observed either at the endosymbiont envelope, division site or cytosol. Available information on targeting motifs for *Angomonas* ETPs is limited, but they are presumed to be delivered via Golgi-derived vesicles, despite lacking canonical SPs [24].

## Concluding statements

Many questions and targeting signals remain to be investigated for trypanosomatids, including those for their defining features, such as the kinetoplast or paraflagellar rod. Discoveries pioneered in trypanosomatid biology have often mediated

their later observation in opisthokonts and other eukaryotes [25]. In turn, we hope to encourage further research into the intricacies of protein targeting in these paradigmatic parasites.

## Author contributions

**Conceptualization:** Julius Lukeš, Michael J. Hammond.

**Data curation:** Max Pendlebury, Michael J. Hammond.

**Formal analysis:** Max Pendlebury, Michael J. Hammond.

**Investigation:** Max Pendlebury, Michael J. Hammond.

**Project administration:** Julius Lukeš.

**Supervision:** Michael J. Hammond.

**Visualization:** Max Pendlebury, Michael J. Hammond.

**Writing – original draft:** Max Pendlebury, Michael J. Hammond.

**Writing – review & editing:** Max Pendlebury, Julius Lukeš, Michael J. Hammond.

## References

1. Walter P, Gilmore R, Blobel G. Protein translocation across the endoplasmic reticulum. *Cell*. 1984;38(1):5–8. [https://doi.org/10.1016/0092-8674\(84\)90520-8](https://doi.org/10.1016/0092-8674(84)90520-8) PMID: 6088076
2. McConville MJ, Mullin KA, Ilgoutz SC, Teasdale RD. Secretory pathway of trypanosomatid parasites. *Microbiol Mol Biol Rev*. 2002;66(1):122–54; table of contents. <https://doi.org/10.1128/MMBR.66.1.122-154.2002> PMID: 11875130
3. Goldshmidt H, Sheiner L, Bütikofer P, Roditi I, Uliel S, Günzel M, et al. Role of protein translocation pathways across the endoplasmic reticulum in *Trypanosoma brucei*. *J Biol Chem*. 2008;283(46):32085–98. <https://doi.org/10.1074/jbc.M801499200> PMID: 18768469
4. Manna PT, Boehm C, Leung KF, Natesan SK, Field MC. Life and times: synthesis, trafficking, and evolution of VSG. *Trends Parasitol*. 2014;30(5):251–8. <https://doi.org/10.1016/j.pt.2014.03.004> PMID: 24731931
5. Denny PW, Gokool S, Russell DG, Field MC, Smith DF. Acylation-dependent protein export in *Leishmania*. *J Biol Chem*. 2000;275(15):11017–25. <https://doi.org/10.1074/jbc.275.15.11017> PMID: 10753904
6. de Paulo Martins V, Okura M, Maric D, Engman DM, Vieira M, Docampo R, et al. Acylation-dependent export of *Trypanosoma cruzi* phosphoinositide-specific phospholipase C to the outer surface of amastigotes. *J Biol Chem*. 2010;285(40):30906–17. <https://doi.org/10.1074/jbc.M110.142190> PMID: 20647312
7. Tazeh NN, Bangs JD. Multiple motifs regulate trafficking of the LAMP-like protein p67 in the ancient eukaryote *Trypanosoma brucei*. *Traffic*. 2007;8(8):1007–17. <https://doi.org/10.1111/j.1600-0854.2007.00588.x> PMID: 17521380
8. Waller RF, McConville MJ. Developmental changes in lysosome morphology and function *Leishmania parasites*. *Int J Parasitol*. 2002;32(12):1435–45. [https://doi.org/10.1016/s0020-7519\(02\)00140-6](https://doi.org/10.1016/s0020-7519(02)00140-6) PMID: 12392909
9. Chasen NM, Etheridge MG, Etheridge RD. The functional characterization of TcMyoF implicates a family of cytosome-cytopharynx targeted myosins as integral to the endocytic machinery of *Trypanosoma cruzi*. *mSphere*. 2020;5(3):e00313-20. <https://doi.org/10.1128/mSphere.00313-20> PMID: 32554712
10. Chaudhuri M, Darden C, Gonzalez FS, Singha UK, Quinones L, Tripathi A. Tim17 updates: a comprehensive review of an ancient mitochondrial protein translocator. *Biomolecules*. 2020;10(12):1643. <https://doi.org/10.3390/biom10121643> PMID: 33297490
11. Darden C, Donkor JE, Korolkova O, Barozai MYK, Chaudhuri M. Distinct structural motifs are necessary for targeting and import of Tim17 in *Trypanosoma brucei* mitochondrion. *mSphere*. 2024;9(1):e0055823. <https://doi.org/10.1128/msphere.00558-23> PMID: 38193679
12. Hamilton V, Singha UK, Smith JT, Weems E, Chaudhuri M. Trypanosome alternative oxidase possesses both an N-terminal and internal mitochondrial targeting signal. *Eukaryot Cell*. 2014;13(4):539–47. <https://doi.org/10.1128/EC.00312-13> PMID: 24562910
13. Bruggisser J, Käser S, Mani J, Schneider A. Biogenesis of a mitochondrial outer membrane protein in *Trypanosoma brucei*: targeting signal and dependence on a unique biogenesis factor. *J Biol Chem*. 2017;292(8):3400–10. <https://doi.org/10.1074/jbc.M116.755983> PMID: 28100781
14. Pyrih J, Hammond M, Alves A, Dean S, Sunter JD, Wheeler RJ, et al. Comprehensive sub-mitochondrial protein map of the parasitic protist *Trypanosoma brucei* defines critical features of organellar biology. *Cell Rep*. 2023;42(9):113083. <https://doi.org/10.1016/j.celrep.2023.113083> PMID: 37669165

15. Galland N, Demeure F, Hannaert V, Verplaetse E, Vertommen D, Van der Smissen P, et al. Characterization of the role of the receptors PEX5 and PEX7 in the import of proteins into glycosomes of *Trypanosoma brucei*. *Biochim Biophys Acta*. 2007;1773(4):521–35. <https://doi.org/10.1016/j.bbamcr.2007.01.006> PMID: [17320990](https://pubmed.ncbi.nlm.nih.gov/17320990/)
16. Saveria T, Halbach A, Erdmann R, Volkmer-Engert R, Landgraf C, Rottensteiner H, et al. Conservation of PEX19-binding motifs required for protein targeting to mammalian peroxisomal and trypanosome glycosomal membranes. *Eukaryot Cell*. 2007;6(8):1439–49. <https://doi.org/10.1128/EC.00084-07> PMID: [17586720](https://pubmed.ncbi.nlm.nih.gov/17586720/)
17. Bauer ST, McQueeney KE, Patel T, Morris MT. Localization of a trypanosome peroxin to the endoplasmic reticulum. *J Eukaryot Microbiol*. 2017;64(1):97–105. <https://doi.org/10.1111/jeu.12343> PMID: [27339640](https://pubmed.ncbi.nlm.nih.gov/27339640/)
18. Canela-Pérez I, López-Villaseñor I, Mendoza L, Cevallos AM, Hernández R. Nuclear localization signals in trypanosomal proteins. *Mol Biochem Parasitol*. 2019;229:15–23. <https://doi.org/10.1016/j.molbiopara.2019.02.003> PMID: [30772422](https://pubmed.ncbi.nlm.nih.gov/30772422/)
19. Jeilani M, Billington K, Sunter JD, Dean S, Wheeler RJ. Nucleolar targeting in an early-branching eukaryote suggests a general mechanism for ribosome protein sorting. *J Cell Sci*. 2022;135(19):jcs259701. <https://doi.org/10.1242/jcs.259701> PMID: [36052646](https://pubmed.ncbi.nlm.nih.gov/36052646/)
20. Hellman K, Prohaska K, Williams N. *Trypanosoma brucei* RNA binding proteins p34 and p37 mediate NOPP44/46 cellular localization via the exportin 1 nuclear export pathway. *Eukaryot Cell*. 2007;6:2206–13.
21. Fridberg A, Buchanan KT, Engman DM. Flagellar membrane trafficking in kinetoplastids. *Parasitol Res*. 2007;100:205–12. <https://doi.org/10.1007/s00436-006-0329-2> PMID: [17058110](https://pubmed.ncbi.nlm.nih.gov/17058110/)
22. Saada EA, Kabututu ZP, Lopez M, Shimogawa MM, Langousis G, Oberholzer M, et al. Insect stage-specific receptor adenylate cyclases are localized to distinct subdomains of the *Trypanosoma brucei* flagellar membrane. *Eukaryot Cell*. 2014;13(8):1064–76. <https://doi.org/10.1128/EC.00019-14> PMID: [24879126](https://pubmed.ncbi.nlm.nih.gov/24879126/)
23. Zakharova A, Tashyreva D, Butenko A, Morales J, Saura A, Svobodová M. A neo-functionalized homolog of host transmembrane protein controls localization of bacterial endosymbionts in the trypanosomatid *Novyimonas esmeraldas*. *Curr Biol*. 2023;33:2690–701.e5. <https://doi.org/10.1016/j.cub.2023.04.060> PMID: [37201521](https://pubmed.ncbi.nlm.nih.gov/37201521/)
24. Morales J, Ehret G, Poschmann G, Reinicke T, Maurya AK, Kröninger L, et al. Host-symbiont interactions in *Angomonas deanei* include the evolution of a host-derived dynamin ring around the endosymbiont division site. *Curr Biol*. 2023;33(1):28–40.e7. <https://doi.org/10.1016/j.cub.2022.11.020> PMID: [36480982](https://pubmed.ncbi.nlm.nih.gov/36480982/)
25. Lukeš J, Speijer D, Ziková A, Alfonzo JD, Hashimi H, Field MC. Trypanosomes as a magnifying glass for cell and molecular biology. *Trends Parasitol*. 2023;39(11):902–12. <https://doi.org/10.1016/j.pt.2023.08.004> PMID: [37679284](https://pubmed.ncbi.nlm.nih.gov/37679284/)
